# Oral Donepezil Reduces Hypersensitivity after Nerve Injury by a Spinal Muscarinic Receptor Mechanism

Bridgette A. Clayton, B.S.,\* Ken-ichiro Hayashida, Ph.D.,† Steven R. Childers, Ph.D.,‡ Ruoyu Xiao, M.D.,§ James C. Eisenach, M.D.||

**Background:** Cholinesterase inhibitors which reach the central nervous system produce pain relief but are poorly tolerated because of gastrointestinal side effects. Here, the authors tested whether donepezil, a central nervous system penetrant cholinesterase inhibitor with a low incidence of gastrointestinal side effects, would relieve hypersensitivity in an animal model of neuropathic pain.

**Methods:** Male rats were anesthetized, and the L5 and L6 spinal nerves were ligated unilaterally. Hypersensitivity was measured by withdrawal threshold to von Frey filament application to the hind paw after oral donepezil, and antagonists administered centrally and peripherally. Efficacy of chronic oral donepezil to relieve hypersensitivity was tested, and activation of G proteins by M<sub>2</sub> muscarinic receptors was determined by carbachol-stimulated [<sup>35</sup>S]guanosine triphosphate <sup>γ</sup>S autoradiography in brain and spinal cord.

**Results:** Spinal nerve ligation resulted in hypersensitivity that was more severe ipsilateral than contralateral to surgery. Oral donepezil reduced hypersensitivity bilaterally in a dose-dependent manner for 2 h, and this effect was blocked by spinal but not supraspinal or peripheral muscarinic receptor antagonism. Oral donepezil maintained efficacy over 2 weeks of twice daily administration, and this treatment did not lead to desensitization of muscarinic receptor-coupled G proteins in brain or spinal cord.

**Conclusions:** Donepezil, a well-tolerated cholinesterase inhibitor used in the treatment of Alzheimer dementia, reduces hypersensitivity in this rat model of neuropathic pain by actions on muscarinic receptors in the spinal cord. Lack of tolerance to this effect, in contrast to rapid tolerance to direct receptor agonists, suggests that cholinesterase inhibition may be useful in the treatment of neuropathic pain.

NEUROPATHIC pain remains an unmet medical need, in part because of poor efficacy of existing treatments and in part because of their therapy limiting side effects. Opioids, for example, demonstrate acute efficacy in treating neuropathic pain,<sup>1</sup> but their prolonged administration is frequently limited by dose escalation and side effects. For these reasons, alternative treatments have been sought, usually guided by efficacy in rodent peripheral nerve injury models of neuropathic pain.

The current study focuses on cholinergic mechanisms of analgesia. Cholinesterase inhibitors have long been recognized to produce acute analgesia in humans,<sup>2</sup> and animal studies indicate supraspinal,<sup>3</sup> spinal,<sup>4</sup> and peripheral<sup>5</sup> sites of action. Several experiments suggest that cholinergic analgesia is augmented after peripheral nerve injury. As such, peripheral nerve injury results in novel cholinergic circuits that underlie analgesia from spinal adrenoceptor activation<sup>6</sup> and increased expression of cholinergic receptors on sensory afferents,<sup>7</sup> which could produce analgesia when stimulated at their peripheral terminals or those in the spinal cord. One purpose of the current study was to determine the site of action of analgesia from systemic administration of a cholinesterase inhibitor after nerve injury. Because both muscarinic and nicotinic receptors can be involved,<sup>6</sup> we also determined which of these types of cholinergic receptors were important to cholinesterase inhibitor analgesia.

Although intravenous physostigmine<sup>8</sup> and intrathecal neostigmine<sup>9</sup> produce analgesia in humans, they are not used clinically, because of commonly occurring and severe nausea. The current study examined an orally active cholinesterase inhibitor, donepezil (Aricept; Pfizer, New York, NY), currently approved for the treatment of Alzheimer dementia. Donepezil is concentrated in the central nervous system after oral administration<sup>10</sup> and is well tolerated in the elderly, with a low (< 5%) incidence of therapy-limiting tolerance.<sup>11</sup> Rats do not show nausea, so we could not determine the therapeutic ratio of donepezil in this species, but we tested the range of oral doses in rats which produce cholinesterase inhibition of similar degree to therapeutic doses in humans,<sup>10,11</sup> and determined its efficacy to reduce hypersensitivity to mechanical stimulation in a peripheral nerve injury model of neuropathic pain.<sup>12</sup>

Cholinesterase inhibitors reduce sedation and respiratory depression from opioids.<sup>8</sup> A recent clinical study demonstrated a reduction in opioid-induced sedation in cancer patients when donepezil was added, but a secondary analysis suggested that this beneficial effect might be reduced with chronic dosing.<sup>13</sup> Tolerance to opioid,  $\alpha_2$ -adrenoceptor, and cholinergic agonists develops rapidly in rats<sup>14,15</sup> and leads to receptor desensitization as determined by a decrease in the ability of agonists to these receptors to stimulate [<sup>35</sup>S]guanosine triphosphate (GTP) <sup>γ</sup>S binding to G proteins.<sup>16</sup> Whether tolerance similarly occurs when availability of the endogenous agonist is increased, such as acetylcholine after cholinesterase inhibition, is uncertain, and a final pur-

\* Technician, † Postdoctoral Research Fellow, ‡ FM James, III Professor of Anesthesiology, Department of Anesthesiology and Center for the Study of Pharmacologic Plasticity in the Presence of Pain, § Professor, § Research Associate, Department of Physiology/Pharmacology and Center for the Study of Pharmacologic Plasticity in the Presence of Pain, Wake Forest University School of Medicine.

Received from the Wake Forest University School of Medicine, Winston-Salem, North Carolina. Submitted for publication August 24, 2006. Accepted for publication November 30, 2006. Supported in part by grant No. NS41386 from the National Institutes of Health, Bethesda, Maryland. Michael M. Todd, M.D., served as Handling Editor for this article. Dr. Eisenach was not involved in the decision-making process.

Address correspondence to Dr. Eisenach: Department of Anesthesiology and Center for the Study of Pharmacologic Plasticity in the Presence of Pain, Wake Forest University School of Medicine, Medical Center Boulevard, Winston-Salem, North Carolina 27157-1009. jim@eisenach.us. Individual article reprints may be purchased through the Journal Web site, www.anesthesiology.org.

pose of the current study was to determine whether chronic donepezil maintained efficacy in reducing hypersensitivity *in vivo* and produced receptor/G-protein desensitization *in vitro*.

## Materials and Methods

### *Animals, Surgery, and Behavioral Testing*

Animal procedures adhered to the Wake Forest University guidelines on the ethical treatment of animals and were approved by the Animal Care and Use Committee, Wake Forest University School of Medicine, Winston-Salem, North Carolina. Male Sprague-Dawley rats (Harlan, Industries, Indianapolis, IN), weighing 125–150 g were used in the current study. Animals were housed with a 12-h dark-light cycle with water and food *ad libitum*.

All animals underwent spinal nerve ligation (SNL) surgery as previously described.<sup>12</sup> Anesthesia was induced and maintained with halothane in oxygen and spontaneous ventilation. The lateral laminae of both the lower lumbar and upper sacral vertebrae were exposed. After the right transverse L6 process was removed, both spinal nerve roots L5 and L6 were identified and ligated by means of a silk 6-0 suture. Before closing the wound, antibiotic ointment was placed in the incision, and rats received 2 ml subcutaneous penicillin-streptomycin.

Sensitivity to light touch was tested by means of von Frey filaments applied to the plantar region of the hind paws (Stoelting, Wood Dale, IL) 2 weeks after SNL surgery. Animals were placed on mesh flooring in clear plastic partitions and allowed to acclimate before testing. A filament was applied to the plantar surface of the paw with enough force to bend it, and a brisk paw withdrawal was considered a positive response. Withdrawal threshold was measured using an up-down statistical method.<sup>17</sup> Only animals without signs of motor weakness and with withdrawal threshold after SNL surgery of 4 g or less were studied.

Intrathecal catheters were inserted in some animals 2 weeks after SNL as previously described.<sup>18</sup> During halothane anesthesia, the head was placed in a stereotaxic frame and a small incision was made at the base of the neck. A polyethylene catheter, 8.5 cm, was introduced through a slit in the atlanto-occipital membrane of the cisterna magnum. The catheter was inserted until the caudal tip reached the lumbar enlargement of the spinal cord and the rostral end was exteriorized at the head. The wound was sutured, and animals were thereafter caged individually. Animals with motor weakness or paralysis after surgery were to be immediately killed, but this was not observed or needed in the current study. Animals were allowed 5 days to recover before behavioral studies.

Intracerebroventricular cannulae were inserted in some animals 2 weeks after SNL. During pentobarbital

anesthesia (50 mg/kg, intraperitoneally), the head was placed in a stereotaxic frame and a small incision was made to expose the skull. The skull surface was cleaned before the implantation of the stainless steel cannula. The coordinates for placement of the tip of the guide cannula were 0.80 mm posterior and 1.5 mm lateral to the bregma, and 3.5 mm ventral from the surface of the dura mater, according to the rat brain atlas.<sup>19</sup> The cannula was secured using dental resin along with a self-tapping screw. Before closing the wound, the guide cannula was capped with a dummy cannula, and 2 ml subcutaneous penicillin-streptomycin was administered. Animals recovered over a period of 5 days and were used only if there was no motor impairment after surgery.

Nociceptive withdrawal threshold to paw pressure was determined in normal animals, using the Randall-Selitto test and an analgesimeter (Ugo Basile, Comerio, Italy). The animal was gently restrained and the hind paw was placed between a clear plastic surface and a plinth. By pressing a pedal that activated a motor, the force applied to the plinth increased at a constant rate on the linear scale. When the animal withdrew the paw or vocalized, the pedal was immediately released and the nociceptive threshold was read on a scale. A cutoff of 250 g was used to avoid potential tissue injury.

### *Acute Drug Administration*

Oral administration of donepezil and vehicle was performed in a volume of 5 ml/kg through an orogastric feeding tube (Solomon Scientific, Plymouth Meeting, PA). Donepezil (Aricept) pills were crushed to a fine powder using a mortar and pestle then dissolved in 0.5% carboxymethylcellulose solution. To determine dose response, eight animals received donepezil 2.5 mg/kg, 10 mg/kg, and vehicle, with experiments separated by 4–5 days. Withdrawal threshold was determined before drug administration and at 30 min and 1, 2, and 4 h thereafter. The experimenter was blind to treatment group.

Several studies were performed with antagonists to determine the pharmacologic mechanism and site of action of donepezil. Drug doses and timing were determined in unblinded pilot experiments, followed by blinded, randomized studies with seven animals per group. The muscarinic antagonist atropine was administered subcutaneously (0.03–1 mg/kg) in a randomized manner simultaneously with oral donepezil, and withdrawal threshold was determined 1 h later. To test a spinal site of action, animals received intrathecal vehicle or atropine (3 and 30  $\mu$ g in 5  $\mu$ l with a 10- $\mu$ l saline flush) 30 min after oral donepezil, with withdrawal threshold measured 30 min later (1 h after donepezil). To test a supraspinal site of action, animals received intracerebroventricular injection of vehicle or atropine, 3  $\mu$ g in 5  $\mu$ l 45 min after oral donepezil, with withdrawal threshold measured 15 min later (1 h after donepezil). We also

examined the effect of intracerebroventricular atropine after oral vehicle, using the same dose and timing. To test a peripheral site of action, animals received a subcutaneous injection of atropine methyl nitrate, a peripherally restricted muscarinic antagonist, 2–5 mg/kg simultaneous with donepezil, and withdrawal threshold was measured 1 h later.

Because the above studies demonstrated a primary spinal site of action, we also tested whether donepezil relied on spinal nicotinic as well as muscarinic cholinergic receptor activation. In these studies, animals were randomly assigned to receive intrathecal saline, the nicotinic antagonist mecamylamine, 50  $\mu$ g, or a combination of this dose of mecamylamine and atropine, 3  $\mu$ g, 30 min after oral donepezil, and withdrawal threshold was determined 30 min later (1 h after donepezil).

#### Chronic Drug Administration

To test efficacy over time, animals were randomly assigned to receive oral vehicle or donepezil, 10 mg/kg, twice a day, for 2 weeks ( $n = 6$ /group). Withdrawal threshold was determined before and at 3, 7, 10, and 14 days after beginning oral treatments by a separate investigator from the one who administered study drug. The investigator performing the behavioral studies was blinded to treatment group.

#### In Vitro Autoradiography of Muscarinic Receptor-stimulated [ $^3$ S]GTP $\gamma$ S Binding in Brain and Spinal Cord Sections

For [ $^3$ S]GTP $\gamma$ S binding in sections, brains and spinal cords were frozen in isopentane at  $-35^\circ$  and stored at  $-80^\circ$ . Coronal sections (20  $\mu$ m) were cut on a cryostat at  $-20^\circ$ C, mounted on gelatin-subbed slides and stored at  $-80^\circ$ . Sections were rinsed in assay buffer (50 mM Tris-HCl, 3 mM MgCl<sub>2</sub>, 0.2 mM EGTA, 100 mM NaCl, pH 7.4) at  $25^\circ$  for 10 min, followed by a 15-min preincubation in assay buffer containing 2 mM GDP and 10 mU/ml adenosine deaminase at  $25^\circ$ . Sections were then incubated in assay buffer with 2 mM GDP, 10 mU/ml adenosine deaminase, and 0.04 nM [ $^3$ S]GTP $\gamma$ S, with (stimulated) or without (basal) 100  $\mu$ M carbachol at  $25^\circ$  for 2 h. Slides were rinsed twice in cold Tris buffer (50 mM Tris-HCl, pH 7.0) for 2 min and once in deionized water for 30 s.<sup>20</sup> After drying at room temperature overnight, sections were exposed to phosphoimaging screens for 18 h in cassettes containing [ $^{14}$ C] standards for densitometric analysis. Phosphoimages were analyzed densitometrically. Values were corrected for [ $^3$ S] based on incorporation of [ $^3$ S] into sections of frozen brain paste as previously described,<sup>20</sup> and correction factors were used to convert [ $^{14}$ C] values to [ $^3$ S] data. Net carbachol-stimulated [ $^3$ S]GTP $\gamma$ S binding was calculated by subtracting basal binding from carbachol-stimulated binding. Data were expressed as nCi [ $^3$ S]GTP $\gamma$ S/g tissue and

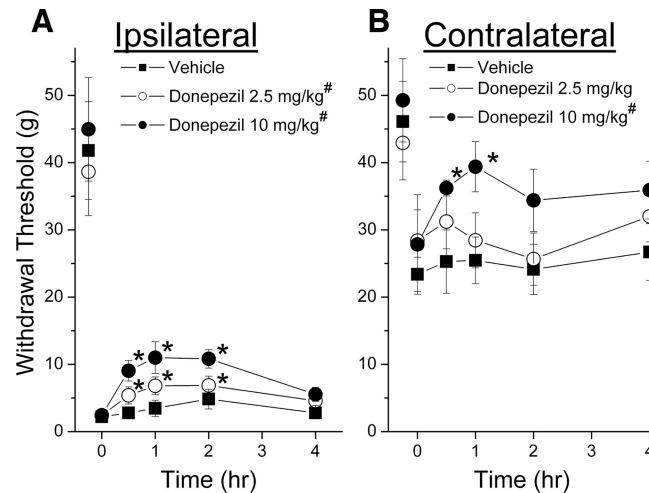

**Fig. 1.** Effect of oral donepezil on withdrawal threshold to von Frey filament application to the hind paw ipsilateral (A) and contralateral (B) to spinal nerve ligation. Symbols to the far left of each panel represent withdrawal threshold before spinal nerve ligation. Each symbol represents the mean  $\pm$  SE of eight animals. \*  $P < 0.05$  compared with time 0 by one-way analysis of variance. #  $P < 0.05$  compared with vehicle by two-way analysis of variance.

are reported as mean values  $\pm$  SE of triplicate sections of brains from at least six animals.

#### Data Analysis

Data are presented as mean  $\pm$  SEM and were analyzed by one- and two-way analysis of variance.  $P < 0.05$  was considered significant.

## Results

Spinal nerve ligation surgery resulted in reduced withdrawal threshold which was more pronounced ipsilateral to surgery, from a population mean of  $29 \pm 2.5$  g before surgery to  $1.8 \pm 0.2$  g ipsilateral to surgery and  $22 \pm 2.1$  g contralateral to surgery (both  $P < 0.01$ ).

#### Dose Response

Oral donepezil increased withdrawal threshold ipsilateral to surgery in a dose-related manner (fig. 1A;  $F_{8,80.06} = 2.5$ ,  $P = 0.018$ ). Greatest effects were seen 1–2 h after drug administration, with the 10-mg/kg dose significantly different from vehicle and the 2.5-mg/kg dose at both 1- and 2-h time points. Effects on contralateral hypersensitivity were also present and dose related. In this case, the lower dose, 2.5 mg/kg, did not separate from vehicle, but 10 mg/kg did increase withdrawal threshold compared with vehicle (fig. 1B;  $F_{2,32.92} = 4.76$ ,  $P = 0.015$ ). The contralateral effect of donepezil also peaked between 1 and 2 h.

#### Site and Mechanism of Action

Systemic (subcutaneous) atropine dose dependently and completely inhibited the effects of donepezil on



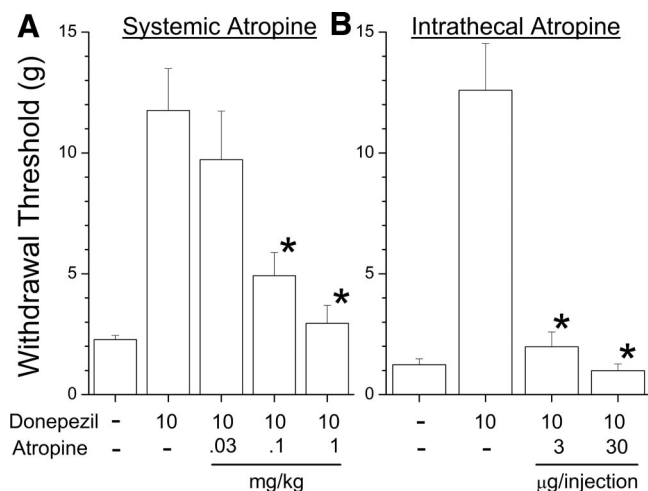

**Fig. 2.** Effect of systemic (A) or intrathecal (B) atropine on withdrawal threshold to von Frey filament application to the hind paw ipsilateral to spinal nerve ligation. Dose of donepezil is shown in mg/kg. Each bar represents the mean  $\pm$  SE of six to eight animals. \*  $P < 0.05$  compared with donepezil, 10 mg/kg alone.

withdrawal threshold ipsilateral to surgery (fig. 2A;  $F_{7,70.4} = 3.04$ ,  $P = 0.008$ ). Intrathecal atropine, which typically is administered in 10- to 30- $\mu$ g doses intrathecally to rats,<sup>6,21-23</sup> abolished the effect of donepezil in a dose as small as 3  $\mu$ g (fig. 2B;  $F_{3,12.68} = 33.37$ ,  $P < 0.001$ ).

In contrast to efficacy from systemically administered atropine, systemic administration of the poorly central nervous system-penetrant atropine congener, atropine methyl nitrate did not block the antihypersensitivity effect of donepezil, even in doses up to 5 mg/kg (fig. 3A). Finally, intracerebroventricular administration of atro-

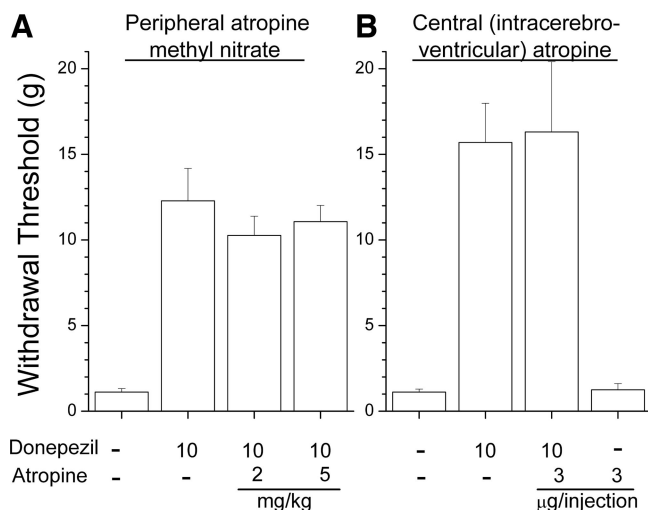

**Fig. 3.** Effect of systemic administration of the poorly central nervous system penetrant drug, atropine methyl nitrate (A) or intracerebroventricular administration of atropine (B) on withdrawal threshold to von Frey filament application to the hind paw ipsilateral to spinal nerve ligation. Dose of donepezil is shown in mg/kg. Each bar represents the mean  $\pm$  SE of six to eight animals. No effect of antagonist against donepezil in either case.

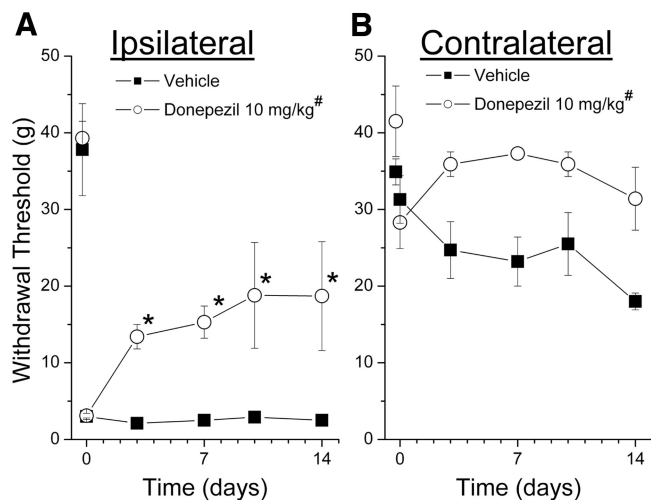

**Fig. 4.** Effect of oral donepezil, 10 mg/kg twice daily, on withdrawal threshold to von Frey filament application to the hind paw ipsilateral (A) and contralateral (B) to spinal nerve ligation. Symbols to the far left of each panel represent withdrawal threshold before spinal nerve ligation. Each symbol represents the mean  $\pm$  SE of six animals. \*  $P < 0.05$  compared with time 0 by one-way analysis of variance. #  $P < 0.05$  compared with vehicle by two-way analysis of variance.

pine, to test supraspinal central nervous system sites of action, did not block the antihypersensitivity effect of donepezil (fig. 3B). Intracerebroventricular injection of atropine alone had no effect on withdrawal threshold (fig. 3B).

Intrathecal mecamylamine also did not block the antihypersensitivity effect of oral donepezil. In these animals, withdrawal threshold of the paw ipsilateral to surgery was  $1.0 \pm 0.1$  g without difference between groups. Oral donepezil in the presence of intrathecal mecamylamine significantly increased withdrawal threshold to  $12 \pm 3.3$  g ( $P < 0.001$ ), whereas donepezil did not increase withdrawal threshold in the presence of the combination of intrathecal mecamylamine and atropine ( $0.6 \pm 0.02$  g).

Paw pressure was administered to test sensitivity to mechanical stimulation in normal rats, because this represents a noxious stimulus in the normal condition, in contrast to von Frey filament testing.<sup>24</sup> Withdrawal threshold 1 h after oral donepezil, 10 mg/kg ( $170 \pm 10$  g), was not increased compared with baseline ( $167 \pm 8$  g), demonstrating lack of acute antinociception from this treatment in the absence of nerve injury.

#### Chronic Drug Administration

Animals appeared normal during the 2 weeks of vehicle or donepezil, 10 mg/kg twice daily, with normal grooming and ambulation and response to handling. Withdrawal threshold ipsilateral to surgery increased in donepezil- but not vehicle-treated animals, and this effect was sustained for the 14 days of treatment (fig. 4A). As in the acute dose-response study, there was a significant effect of treatment on withdrawal threshold con-

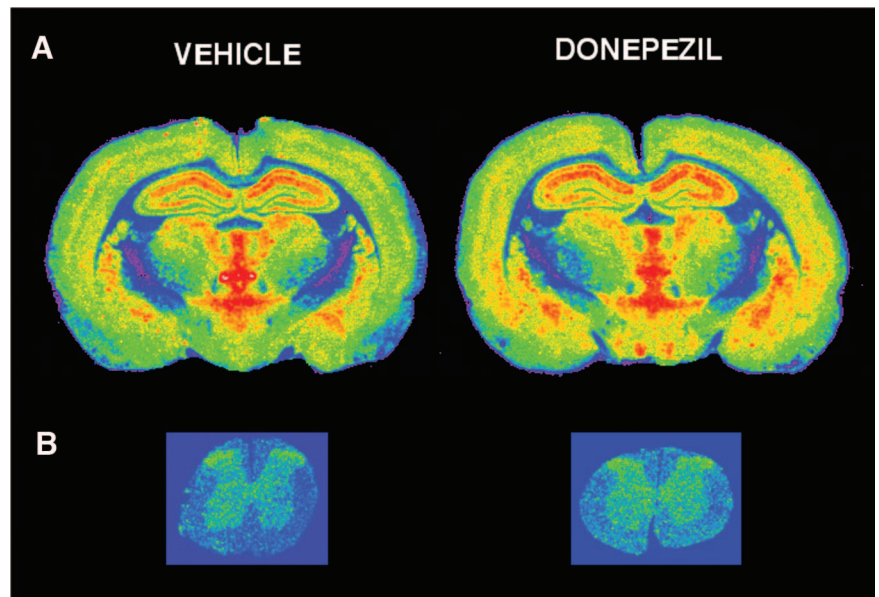

**Fig. 5.** Autoradiography of muscarinic-stimulated [ $^{35}\text{S}$ ]guanosine triphosphate  $\gamma\text{S}$  binding in sections from midbrain (A) and spinal cord (B). *Left*, sections from vehicle-treated rats; *right*, sections from rats treated chronically with donepezil as described in the Materials and Methods. Shown are typical sections incubated *in vitro* with  $100\ \mu\text{M}$  carbachol.

tralateral to surgery over the 2-week trial, although the level of hypersensitivity and the drug effect were less than ipsilateral to surgery (fig. 4B).

To determine whether chronic treatment with donepezil had any effect on muscarinic receptor coupling to G proteins, sections from both brain and spinal cord from vehicle- and donepezil-treated rats were assayed for carbachol-stimulated [ $^{35}\text{S}$ ]GTP $\gamma\text{S}$  binding. Figure 5 shows representative autoradiograms from both groups of animals. In spinal cord, carbachol stimulated [ $^{35}\text{S}$ ]GTP $\gamma\text{S}$  binding in the superficial laminae of dorsal horn, as previously described,<sup>25</sup> whereas in midbrain, significant carbachol-stimulated [ $^{35}\text{S}$ ]GTP $\gamma\text{S}$  binding was observed in both thalamus and hippocampus. Chronic treatment of rats with donepezil had no discernible effect on carbachol-stimulated [ $^{35}\text{S}$ ]GTP $\gamma\text{S}$  binding in any of these tissues. Densitometric analysis of [ $^{35}\text{S}$ ]GTP $\gamma\text{S}$  autoradiography (table 1) confirmed these findings, with no significant change in net carbachol-stimulated binding in dorsal horn, thalamus, or hippocampus after chronic donepezil administration.

**Table 1.** Effect of Chronic Donepezil Treatment on Muscarinic Receptor-stimulated [ $^{35}\text{S}$ ]GTP $\gamma\text{S}$  Binding in Brain and Spinal Cord

| Tissue      | Net Carbachol-stimulated Binding, nCi/g (% of Control) |                            |
|-------------|--------------------------------------------------------|----------------------------|
|             | Vehicle                                                | Donepezil                  |
| Spinal cord | 40 $\pm$ 3 (100 $\pm$ 7)                               | 40 $\pm$ 3 (101 $\pm$ 7)   |
| Thalamus    | 380 $\pm$ 8 (100 $\pm$ 2)                              | 400 $\pm$ 6 (105 $\pm$ 2)  |
| Hippocampus | 300 $\pm$ 7 (100 $\pm$ 2)                              | 300 $\pm$ 11 (102 $\pm$ 4) |

Sections from spinal cord and brain were removed from animals chronically treated with vehicle or donepezil, and assayed for [ $^{35}\text{S}$ ]guanosine triphosphate (GTP)  $\gamma\text{S}$  autoradiography in the presence and absence of  $100\ \mu\text{M}$  carbachol as described in the Materials and Methods. Results are mean values  $\pm$  SEM of nCi/g [ $^{35}\text{S}$ ] as determined by densitometry (with percent of control in parentheses).

## Discussion

The current study provides new mechanistic and practical insights into cholinergic analgesia in the setting of neuropathic pain. From a mechanistic standpoint, the current study demonstrates efficacy of cholinesterase inhibition to reduce hypersensitivity both ipsilateral to injury and its spread contralaterally (so-called mirror image pain). In addition, this study describes the site of action and cholinergic receptor type involved in the antihypersensitivity effect of donepezil and suggests that this drug, unlike direct agonists, may have sustained efficacy to treat pain without dose escalation from tolerance. From a practical standpoint, although other cholinesterase inhibitors have previously been demonstrated to reduce hypersensitivity after nerve injury in animals, this is the first study to examine a clinically available and well-tolerated cholinesterase inhibitor. The observed efficacy from this agent supports its introduction into clinical trials.

Peripheral nerve injury, whether by SNL or acute neuritis of the sciatic nerve, results in hypersensitivity to tactile stimulation bilaterally, although the effect is much more marked on the side of injury.<sup>12,26</sup> This extension of hypersensitivity depends on afferent input from the injured area and may reflect bilateral glial activation in the spinal cord *via* gap junction connections.<sup>27</sup> It is conceivable that donepezil reduced hypersensitivity bilaterally due to actions on glia, but this is unlikely because the immunosuppressive effects of acetylcholine depend primarily on nicotinic receptor activation,<sup>28</sup> and yet the nicotinic receptor antagonist, mecamylamine, was ineffective to block the antihypersensitivity effect of donepezil. More likely, increased acetylcholine in the spinal cord ipsilateral to nerve injury after donepezil reduced afferent input by a presynaptic mechanism<sup>29</sup> or by re-

ducing interneuron activation by a postsynaptic mechanism.<sup>30</sup>

Analgesia from cholinergic agonists has been suggested to reflect actions in the brain,<sup>3</sup> the spinal cord,<sup>4</sup> and at peripheral terminals of sensory afferents.<sup>5</sup> Both muscarinic and nicotinic receptor activation can result in analgesia.<sup>6</sup> Analgesia has also been demonstrated in humans receiving cholinesterase inhibitors systemically with high (physostigmine)<sup>31</sup> or low (neostigmine)<sup>2</sup> ability to penetrate the central nervous system, as well as intrathecal neostigmine,<sup>9</sup> consistent with actions in the brain, spinal cord, or periphery. The current study argues strongly for a spinal site of action on muscarinic receptors to reduce hypersensitivity in nerve-injured rats receiving oral donepezil, because the effect of donepezil was blocked by spinal atropine, but not systemic atropine methyl nitrate or intracerebroventricular atropine in doses of known specificity to block peripheral and supraspinal muscarinic receptors.<sup>32,33</sup> It is unlikely that intrathecal atropine produced a pronociceptive effect that merely counterbalanced the effect of donepezil, because atropine alone has no effect in normal or spinal nerve-ligated animals.<sup>34</sup> Because intrathecal neostigmine produces analgesia in humans, including those with neuropathic pain,<sup>35</sup> it is possible that a spinal site of action of donepezil could be applicable to humans as well.

Tolerance to opioid analgesics is a well-described phenomenon in humans as well as animals and leads to a reduction in efficacy of a fixed dose and shift in the dose response, necessitating dose escalation over time. This phenomenon occurs rapidly in rats, with maximally analgesic doses of opioids totally lacking efficacy after 3–5 days of continuous treatment.<sup>15</sup> A similar speed and degree of tolerance appears with intrathecal injection of the cholinergic agonist, carbachol,<sup>14</sup> but the current study showed no such tolerance with maximally effective doses of donepezil over 2 weeks. Dose escalation is rarely needed with drugs that inhibit reuptake of endogenous neurotransmitters, such as antidepressants, and with cholinesterase inhibitors for the treatment of dementia or myasthenia gravis, perhaps because of differing efficacy of endogenous neurotransmitters to induce receptor desensitization mechanisms than synthetic ligands.

Tolerance to chronic drug administration is often accompanied by a desensitization of receptor-coupled G proteins, as determined by a decrease in agonist-stimulated [<sup>35</sup>S]GTP $\gamma$ S binding. Such desensitization effects have been observed in brain and spinal cord after chronic administration of opioids,<sup>25</sup>  $\Delta^9$ -tetrahydrocannabinol,<sup>36</sup> and buspirone.<sup>37</sup> The finding in the current study that chronic treatment with donepezil had no effect on muscarinic activation of G proteins is consistent with the lack of tolerance observed in hypersensitivity tests in these same animals. It is possible that

elevation of endogenous neurotransmitters by drugs such as donepezil may have differing ability to produce desensitization compared with direct-acting agonists; future studies in our laboratory will examine this issue by directly comparing the effects of chronic donepezil and carbachol on desensitization of muscarinic receptor-coupled G proteins. However, we do know that elevation of endogenous neurotransmitters can produce desensitization of receptor-coupled G proteins in other systems. Recent studies in our laboratory<sup>38</sup> revealed that chronic administration in rats with a potent inhibitor of monoamine transporters produced significant desensitization of dopamine D<sub>2</sub>, 5-hydroxytryptamine<sub>1A</sub>, and  $\alpha_2$ -adrenergic receptor-stimulated [<sup>35</sup>S]GTP $\gamma$ S binding in several brain areas.<sup>39</sup> However, this transporter blocker had extraordinary affinity at monoamine transporters, with corresponding long duration of action.<sup>40</sup> Therefore, it is possible that the efficacy of such drugs to produce desensitization after chronic administration may depend on their affinity and duration of action.

The ultimate utility of donepezil in treating chronic pain in humans cannot be addressed by studies in animals. The effect of donepezil on hypersensitivity, although significant, was modest compared with that of morphine and gabapentin.<sup>41,42</sup> Intrathecal neostigmine or systemic physostigmine produce severe nausea,<sup>8,9</sup> but therapy with donepezil is limited by nausea in less than 5% of cases.<sup>11</sup> The only study to examine donepezil in patients with pain was designed to test the hypothesis that donepezil reduced sedation from opioids, which it did.<sup>13</sup> Pain scores were numerically reduced in the 19 subjects in that study in whom visual analog pain scores were obtained, from 47 mm before donepezil to 37 mm afterward (0- to 100-mm scale), although this difference was not significant ( $P = 0.07$ ).<sup>13</sup> Based on these encouraging data, we are currently examining efficacy of oral donepezil to treat pain and improve cognition in patients with chronic pain.

## Conclusion

In summary, oral donepezil reduces hypersensitivity both ipsilateral and contralateral to SNL in a rat model of neuropathic pain. Inhibition of donepezil by intrathecal but not intracerebroventricular atropine, and by systemic atropine but not atropine methyl nitrate, suggest that oral donepezil reduces hypersensitivity by an action in the spinal cord. Donepezil maintained undiminished efficacy with twice daily dosing for 2 weeks, unlike previous studies with opioid or cholinergic agonists, consistent with a lack of tolerance development. Although we could not assess the incidence of nausea, the most common side effect in humans from this class of drugs, these data in rats strongly support examination of this agent and other cholinesterase inhibitors developed



to treat dementia as analgesics for patients in neuropathic pain.

## References

- Raja SN, Haythornthwaite JA, Pappagallo M, Clark MR, Trivison TG, Sabeen S, Royall RM, Max MB: Opioids *versus* antidepressants in postherpetic neuralgia: A randomized, placebo-controlled trial. *Neurology* 2002; 59:1015-21
- Christensen EM, Gross EG: Analgesic effects in human subjects of morphine, meperidine and methadone. *JAMA* 1948; 137:594-9
- Fujimoto JM, Rady JJ: Intracerebroventricular physostigmine-induced analgesia: Enhancement by naloxone,  $\beta$ -funaltrexamine and nor-binaltorphimine and antagonism by dynorphin A (1-17). *J Pharmacol Exp Ther* 1989; 251:1045-52
- Yaksh TL, Dirksen R, Harty GJ: Antinociceptive effects of intrathecally injected cholinomimetic drugs in the rat and cat. *Eur J Pharmacol* 1985; 117:81-8
- Dussor GO, Helesic G, Hargreaves KM, Flores CM: Cholinergic modulation of nociceptive responses *in vivo* and neuropeptide release *in vitro* at the level of the primary sensory neuron. *Pain* 2004; 107:22-32
- Pan HL, Chen SR, Eisenach JC: Intrathecal clonidine alleviates allodynia in neuropathic rats: Interaction with spinal muscarinic and nicotinic receptors. *ANESTHESIOLOGY* 1999; 90:509-14
- Hayashida K, Bynum T, Vincler M, Eisenach JC: Inhibitory M2 muscarinic receptors are upregulated in both axotomized and intact small diameter dorsal root ganglion cells after peripheral nerve injury. *Neuroscience* 2006; 140:259-68
- Weinstock M, Davidson JT, Rosin AJ, Schnieden H: Effect of physostigmine on morphine-induced postoperative pain and somnolence. *Br J Anaesth* 1982; 54:429-34
- Lauretti GR, Hood DD, Eisenach JC, Pfeifer BL: A multi-center study of intrathecal neostigmine for analgesia following vaginal hysterectomy. *ANESTHESIOLOGY* 1998; 89:913-8
- Matsui K, Mishima M, Nagai Y, Yuzuriha T, Yoshimura T: Absorption, distribution, metabolism, and excretion of donepezil (Aricept) after a single oral administration to rat. *Drug Metab Dispos* 1999; 27:1406-14
- Kaduszkiewicz H, Zimmermann T, Beck-Bornholdt HP, van den Bussche H: Cholinesterase inhibitors for patients with Alzheimer's disease: Systematic review of randomised clinical trials. *BMJ* 2005; 331:321-7
- Kim SH, Chung JM: An experimental model for peripheral neuropathy produced by segmental spinal nerve ligation in the rat. *Pain* 1992; 50:355-63
- Slatkin NE, Rhiner M: Treatment of opiate-related sedation: Utility of the cholinesterase inhibitors. *J Support Oncol* 2003; 1:53-63
- Svensson BA, Sottile A, Gordh T Jr: Studies on the development of tolerance and potential spinal neurotoxicity after chronic intrathecal carbachol-antinociception in the rat. *Acta Anaesthesiol Scand* 1991; 35:141-7
- Solomon RE, Gebhart GF: Intrathecal morphine and clonidine: Antinociceptive tolerance and cross-tolerance and effects on blood pressure. *J Pharmacol Exp Ther* 1988; 245:444-54
- Sim-Selley LJ, Selley DE, Vogt LJ, Childers SR, Martin TJ: Chronic heroin self-administration desensitizes  $\mu$  opioid receptor-activated G-proteins in specific regions of rat brain. *J Neurosci* 2000; 20:4555-62
- Chaplan SR, Bach FW, Pogrel JW, Chung JM, Yaksh TL: Quantitative assessment of tactile allodynia in the rat paw. *J Neurosci Methods* 1994; 53:55-63
- Yaksh TL, Rudy TA: Chronic catheterization of the spinal subarachnoid space. *Physiol Behav* 1976; 7:1032-6
- Paxinos G, Watson C: *The Rat Brain in Stereotaxic Coordinates*. San Diego, Academic Press, 2005
- Sim LJ, Selley DE, Childers SR: *In vitro* autoradiography of receptor-activated G-proteins in rat brain by agonist-stimulated guanylyl 5'-[ $\gamma$ - $^{35}$ S]thio]triphosphate binding. *Proc Natl Acad Sci U S A* 1995; 92:7242-6
- Chiari A, Tobin JR, Pan HL, Hood DD, Eisenach JC: Sex differences in cholinergic analgesia: I. A supplemental nicotinic mechanism in normal females. *ANESTHESIOLOGY* 1999; 91:1447-54
- Lavand'homme PM, Eisenach JC: Sex differences in cholinergic analgesia: II. Differing mechanisms in two models of allodynia. *ANESTHESIOLOGY* 1999; 91:1455-61
- Duffo F, Conklin D, Li XH, Eisenach JC: Spinal adrenergic and cholinergic receptor interactions activated by clonidine in postincisional pain. *ANESTHESIOLOGY* 2003; 98:1237-42
- Hogan Q, Sapunar D, Modric-Jednacak K, McCallum JB: Detection of neuropathic pain in a rat model of peripheral nerve injury. *ANESTHESIOLOGY* 2004; 101:476-87
- Maher CE, Eisenach JC, Pan HL, Xiao RY, Childers SR: Chronic intrathecal morphine administration produces homologous mu receptor/G-protein desensitization specifically in spinal cord. *Brain Res* 2001; 895:1-8
- Milligan ED, Twining C, Chacur M, Biedenkapp J, O'Connor K, Poole S, Tracey K, Martin D, Maier SF, Watkins LR: Spinal glia and proinflammatory cytokines mediate mirror-image neuropathic pain in rats. *J Neurosci* 2003; 23:1026-40
- Spataro LE, Sloane EM, Milligan ED, Wieseler-Frank J, Schoeniger D, Jekich BM, Barrientos RM, Maier SF, Watkins LR: Spinal gap junctions: Potential involvement in pain facilitation. *J Pain* 2004; 5:392-405
- Wang H, Yu M, Ochani M, Amella CA, Tanovic M, Susarla S, Li JH, Wang HC, Yang H, Ulloa L, Al Abed Y, Czura CJ, Tracey KJ: Nicotinic acetylcholine receptor  $\alpha 7$  subunit is an essential regulator of inflammation. *Nature* 2003; 421:384-8
- Li DP, Chen SR, Pan YZ, Levey AI, Pan HL: Role of presynaptic muscarinic and GABA<sub>B</sub> receptors in spinal glutamate release and cholinergic analgesia in rats. *J Physiol* 2002; 543:807-18
- Chen SR, Pan HL: Activation of muscarinic receptors inhibits spinal dorsal horn projection neurons: Role of GABA<sub>B</sub> receptors. *Neuroscience* 2004; 125:141-8
- Petersson J, Gordh TE, Hartvig P, Wiklund L: A double-blind trial of the analgesic properties of physostigmine in postoperative patients. *Acta Anaesthesiol Scand* 1986; 30:283-8
- Ishiyama Y, Yoshiyama M, Yokoyama O, Namiki M, De Groat WC: Central muscarinic mechanisms regulating voiding in rats. *J Pharmacol Exp Ther* 2001; 297:933-9
- Radhakrishnan V, Sharma KN: Effect of selective gastric vagotomy on gustatory behavior in rats. *J Auton Nerv Syst* 1986; 16:127-36
- Paqueron X, Conklin D, Eisenach JC: Plasticity in action of intrathecal clonidine to mechanical but not thermal nociception after peripheral nerve injury. *ANESTHESIOLOGY* 2003; 99:199-204
- Klamt JG, Dos Reis MP, Neto JB, Prado WA: Analgesic effect of subarachnoid neostigmine in two patients with cancer pain. *Pain* 1996; 66:389-91
- Breivogel CS, Childers SR, Deadwyler SA, Hampson RE, Vogt LJ, Sim-Selley LJ: Chronic  $\Delta 9$ -tetrahydrocannabinol produces a time-dependent loss of cannabinoid receptors and cannabinoid receptor-activated G-proteins in rat brain. *J Neurochem* 1999; 73:2447-59
- Sim-Selley LJ, Vogt LJ, Xiao R, Childers SR, Selley DE: Region-specific changes in 5-HT<sub>1A</sub> receptor-activated G-proteins in rat brain following chronic buspirone. *Eur J Pharmacol* 2000; 389:147-53
- O'Connor KA, Gregg TC, Davies HML, Childers SR: Effects of long-term biogenic amine transporter blockade on receptor/G-protein coupling in rat brain. *Neuropharmacology* 2004; 48:62-71
- O'Connor KA, Porrino LJ, Davies HM, Childers SR: Time-dependent changes in receptor/G-protein coupling in rat brain following chronic monoamine transporter blockade. *J Pharmacol Exp Ther* 2005; 313:510-7
- Daunais JB, Hart SL, Smith HR, Childers SR: Long-acting blockade of biogenic amine transporters in rat brain by administration of the potent novel tropane 2beta-propranolol-3beta-(2-Naphthyl)-tropane. *J Pharmacol Exp Ther* 1998; 285:1246-54
- Zhang Y, Conklin DR, Li XH, Eisenach JC: Intrathecal morphine reduces allodynia after peripheral nerve injury in rats *via* activation of a spinal A1 adenosine receptor. *ANESTHESIOLOGY* 2005; 102:416-20
- Chen SR, Eisenach JC, McCaslin PP, Pan HL: Synergistic effect between intrathecal non-NMDA antagonist and gabapentin on allodynia induced by spinal nerve ligation in rats. *ANESTHESIOLOGY* 2000; 92:500-6
